# Supplementary material
Source: ML conference proceedings conference paper supplement (https://openreview.net/forum?id=0aijVq844S)

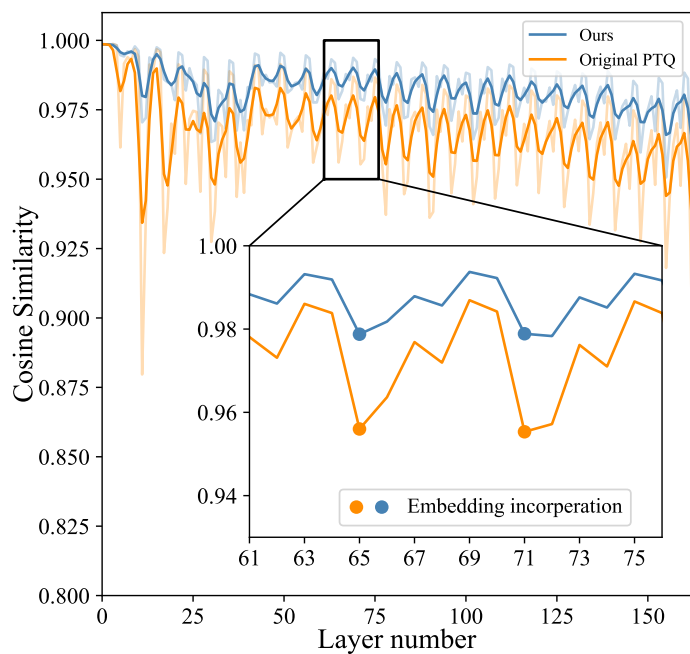

**a, Cosine similarity in a single step**

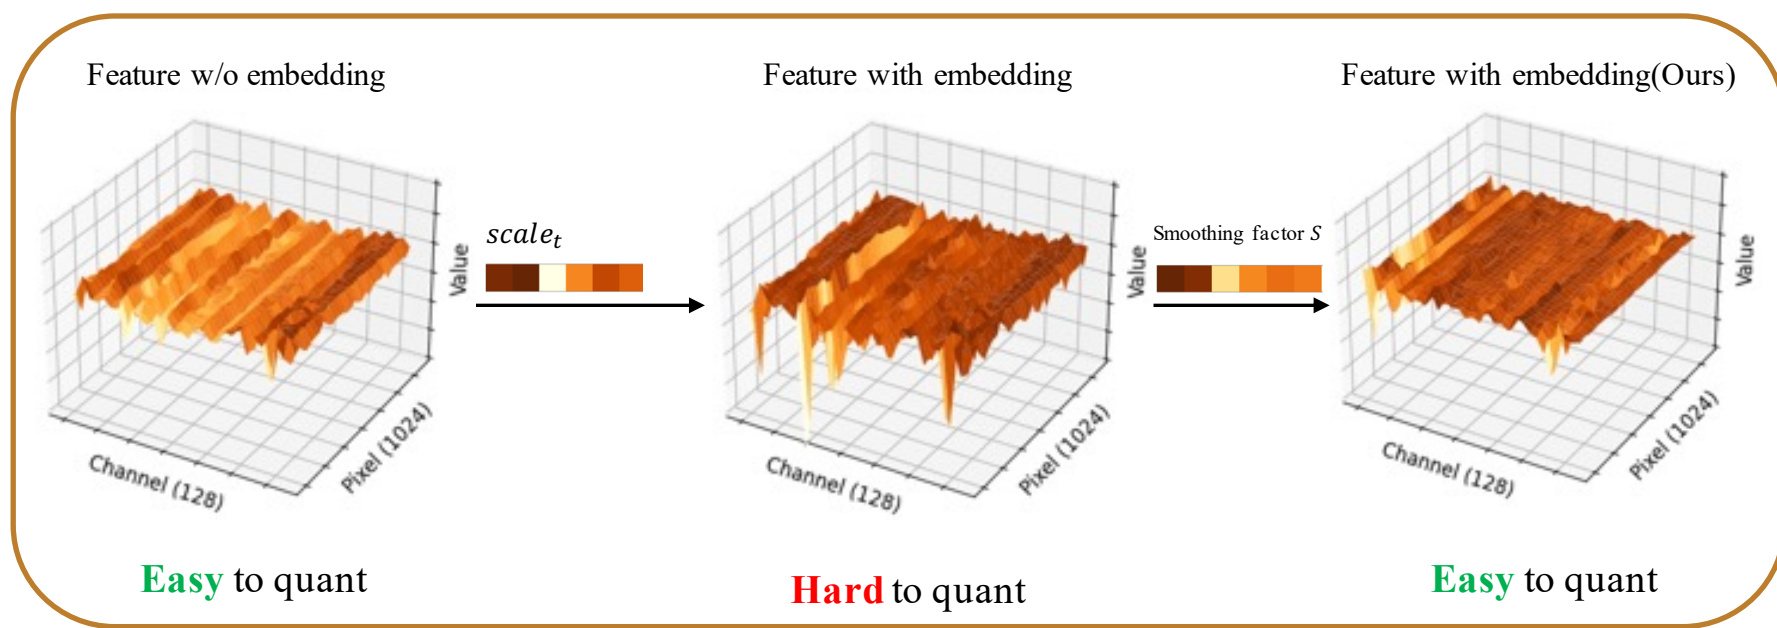

**b, activation and embedding distribution**

Supplement: supplementary_material [file attachment]

## Inter Quantization Noise Correction

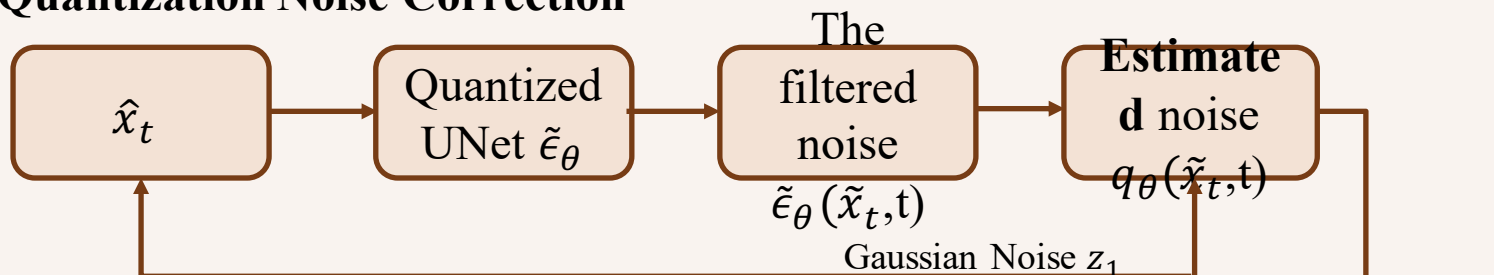

## Sampling Process

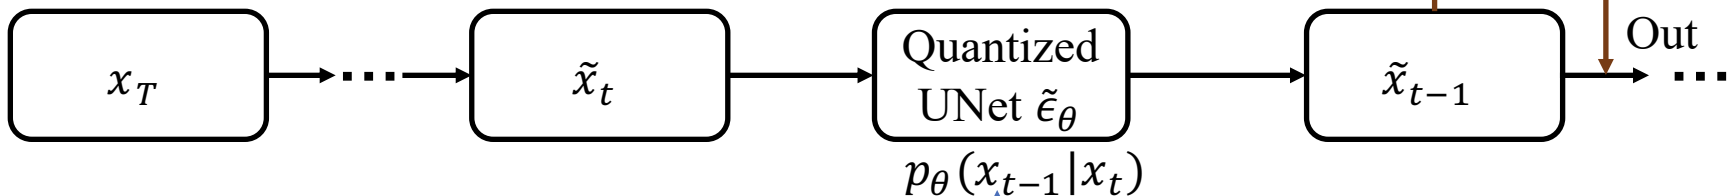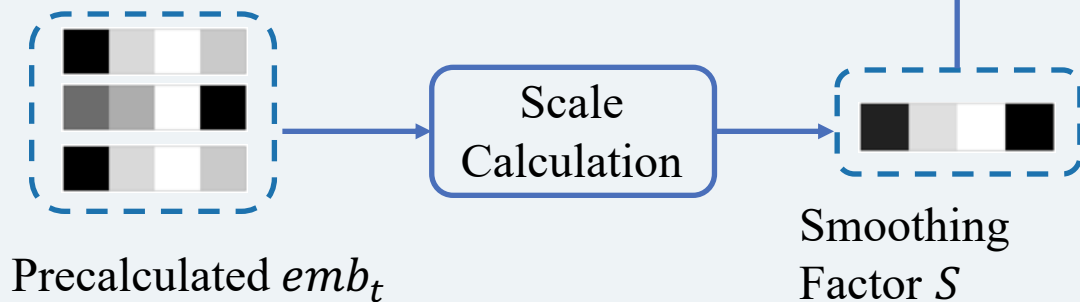

## Intra Quantization Noise Correction

Supplement: supplementary_material [file attachment]

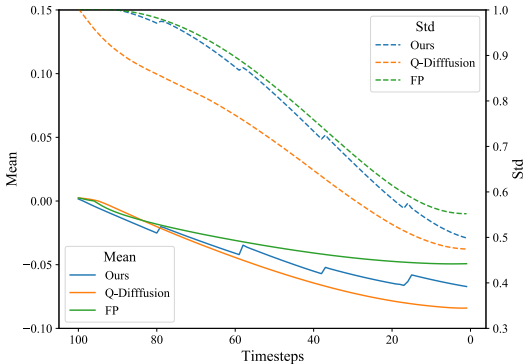

**a, Mean and Std among sampling steps**

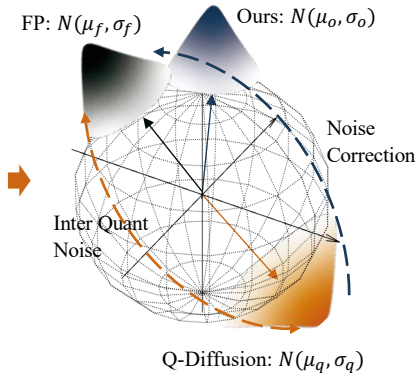

**b, Output distribution of a single step**

Supplement: supplementary_material [file attachment]

■ Q-Diffusion    ■ Ours

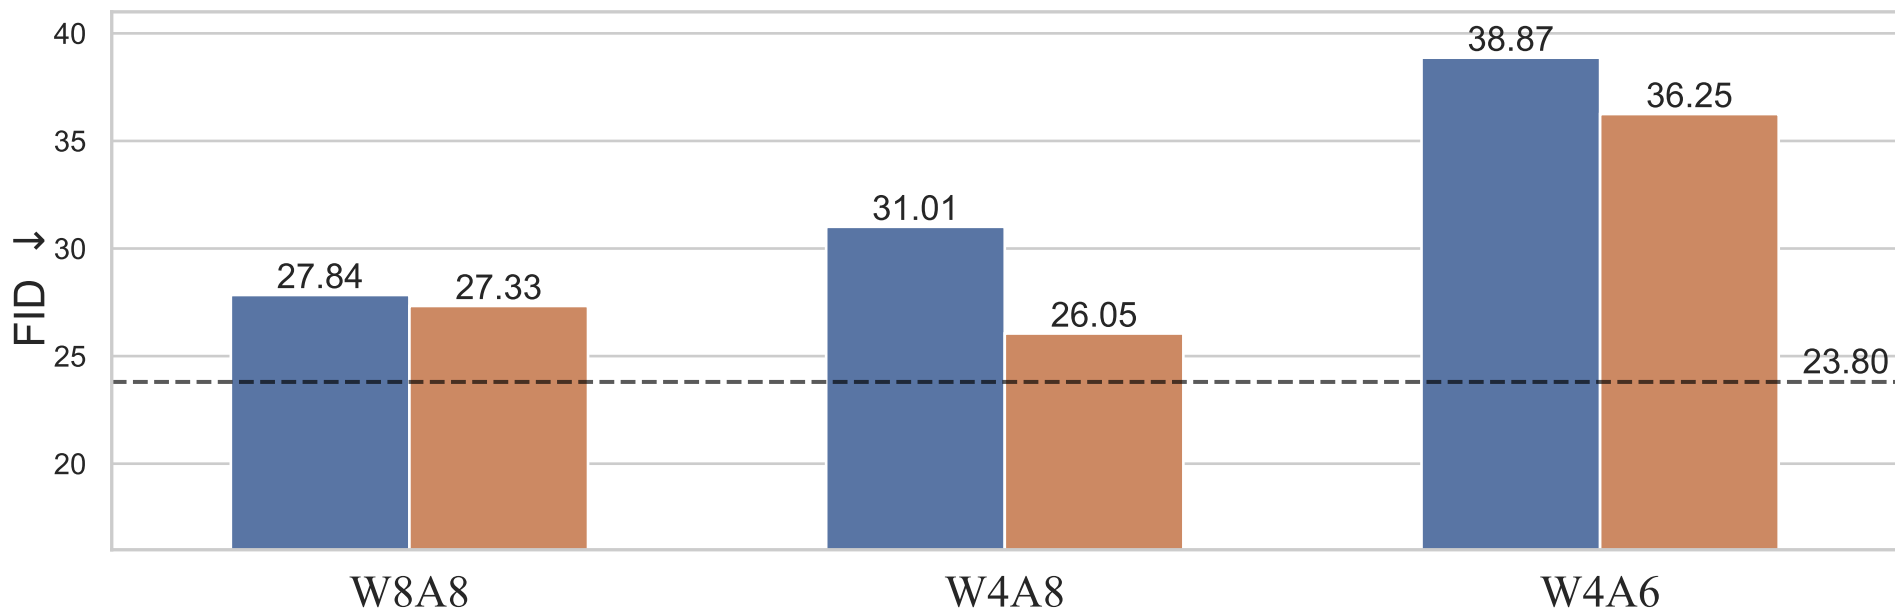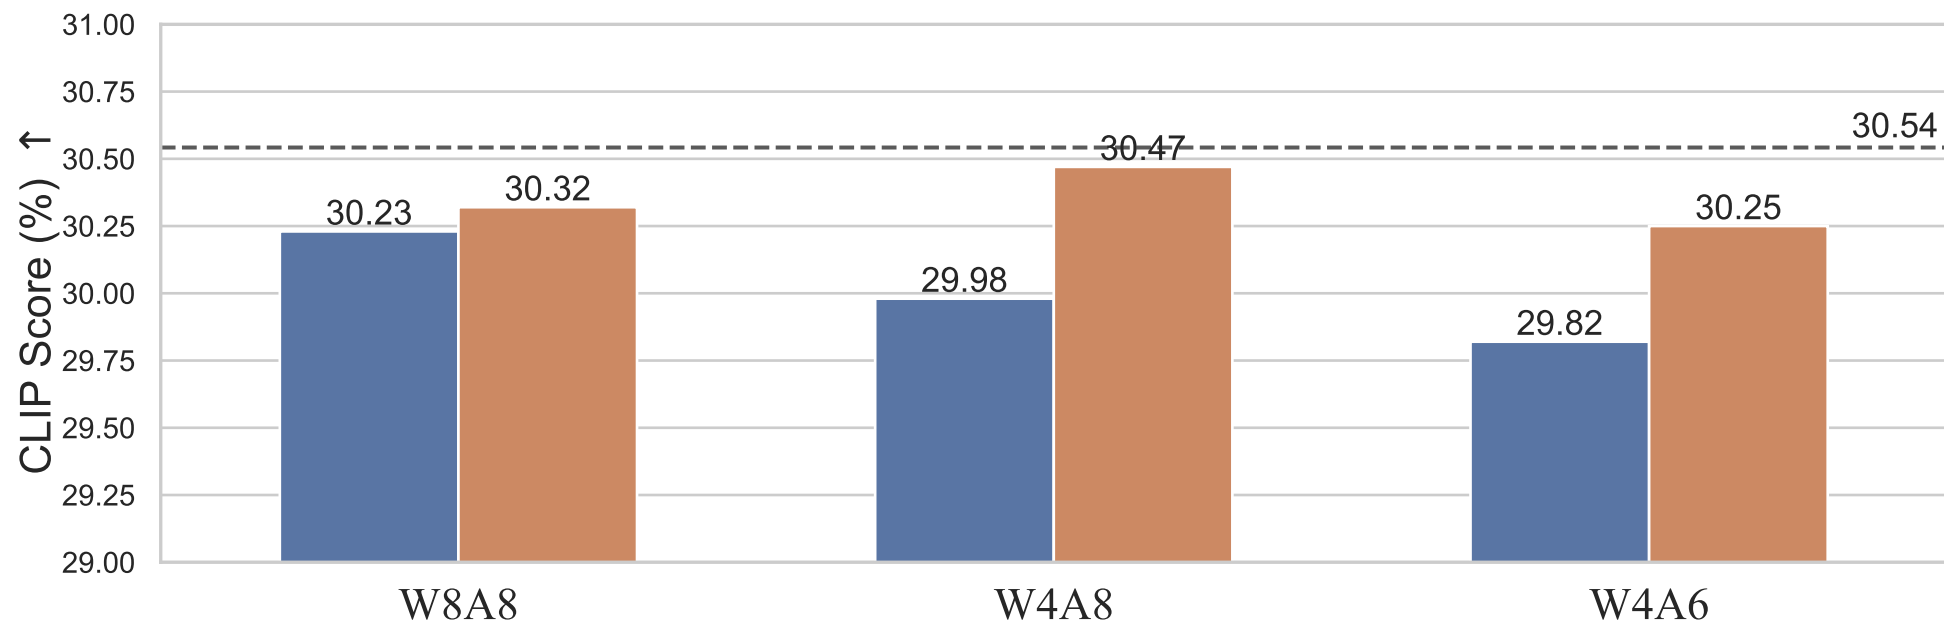

Supplement: supplementary_material [file attachment]
